# Supplementary material for: Exploring Adult Eating Behaviors and Food Neophobia: A National Study in Romania
Source: MDPI journal article supplement (doi:10.3390/foods13091301), 2024-04-24
Supplement: s1 [file s1]

**Supplementary Table 1.** Food Neophobia scale English and Romanian version.

| English statement version                             | Romanian statement version                                                   |
|-------------------------------------------------------|------------------------------------------------------------------------------|
| 1. I am constantly sampling new and different foods.  | 1. Am mereu curiozitatea sa incerc alimente diferite si noi                  |
| 2. I don't trust new foods.                           | 2. Nu am incredere in noi sortimente de mancare                              |
| 3. If I don't know what is in a food, I won't try it. | 3. Daca nu cunosc ingredientele care sunt in mancare, nu o incerc            |
| 4. I like foods from different countries.             | 4. Imi plac mancarurile specifice altor tari                                 |
| 5. Ethnic food looks too weird to eat.                | 5. Mancarea cu specific strain arata prea ciudat ca sa o consum              |
| 6. At dinner parties, I will try a new food.          | 6. La petreceri incerc sortimente noi de mancare                             |
| 7. I am afraid to eat things I have never had before. | 7. Imi este frica sa mananc alimente pe care nu le-am mai incercat pana acum |
| 8. I am very particular about the foods I will eat.   | 8. Sunt foarte atent cu privire la alimentele pe care le voi manca           |
| 9. I will eat almost anything                         | 9. Mananc aproape orice                                                      |
| 10. I like to try new ethnic restaurants.             | 10. Imi place sa incerc restaurante cu specific strain                       |
